# Supplementary figures and images for: Underestimated Damage Caused by the European Hazelnut Weevil, Curculio nucum (Curculionidae)
Source: MDPI journal article supplement (doi:10.3390/agronomy12123059), 2022-12-02

# Figure S1

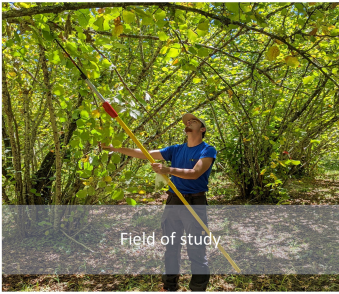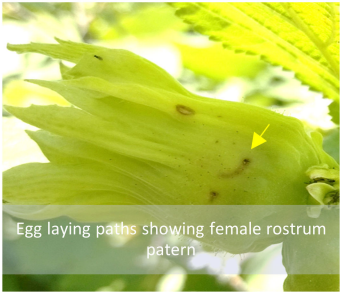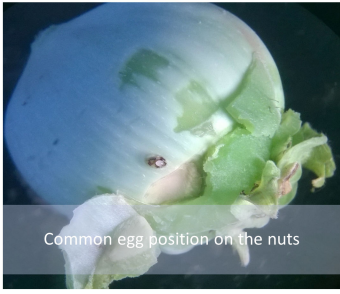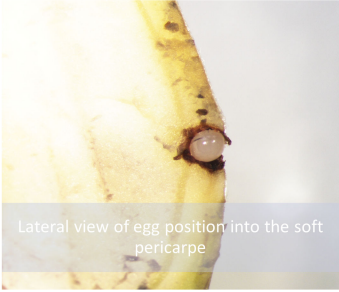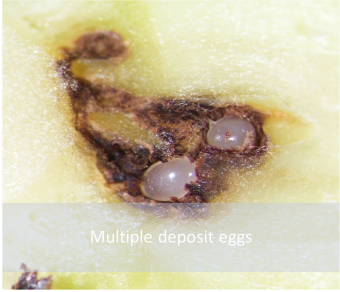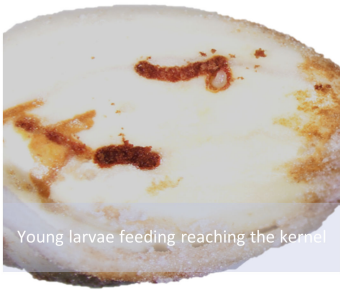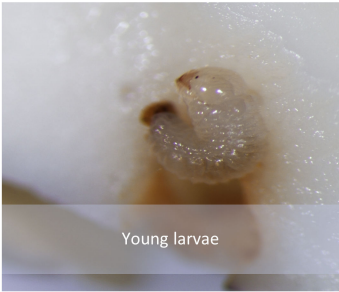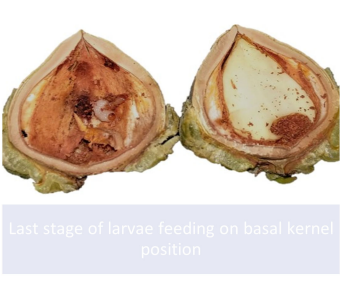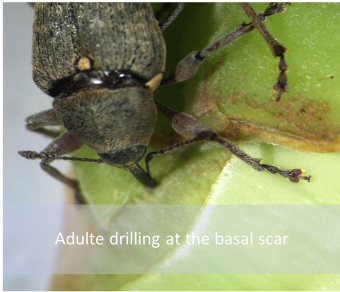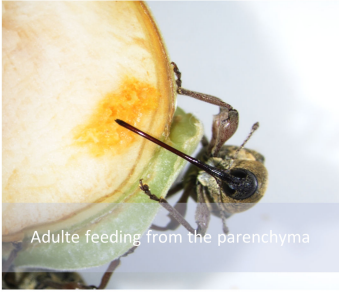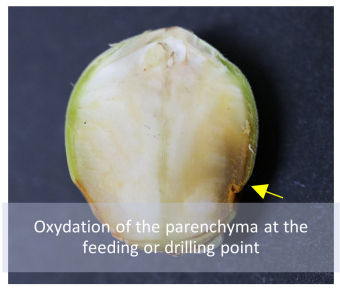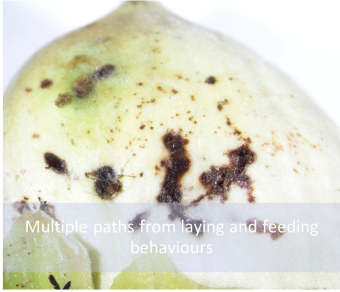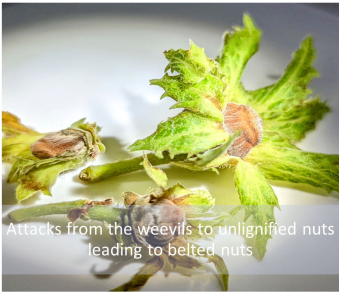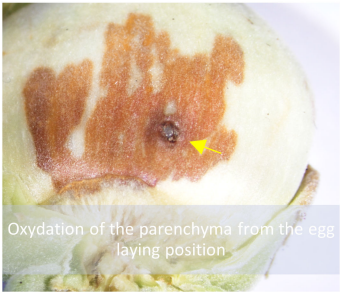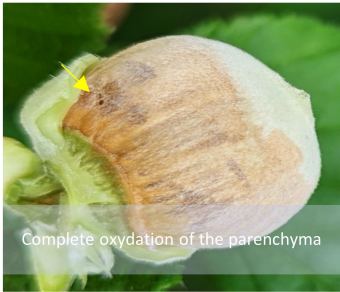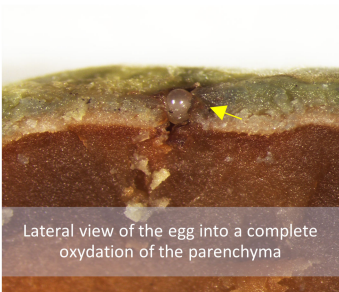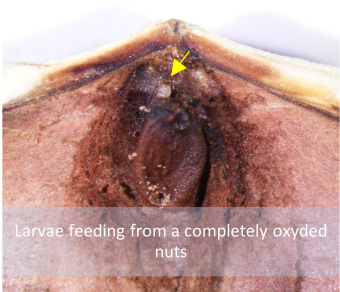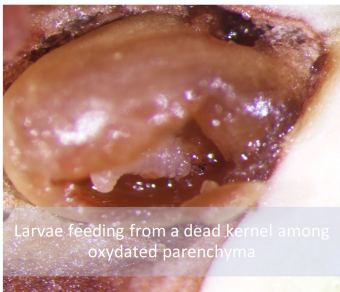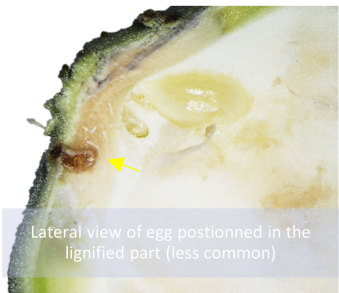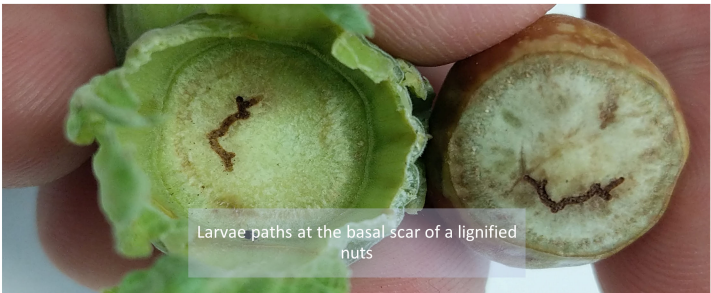

Supplement: s1 [file s1]
